# Supplementary material
Source: Research Square preprint supplement (doi:10.21203/rs.3.rs-9058836/v1)
Supplement: Supplementary file 1 [file 932c0f11abb9d4a43724dbe5.docx]

Expert Consultation Questionnaire (First Round) for the Construction of an Evaluation Index System for Ideological and Political Education in Fundamental Nursing Courses Based on the CIPP Model

Dear Expert,

Hello!

We sincerely appreciate you taking time out of your busy schedule to participate in this survey.

The aim of this study is to construct an evaluation index system for ideological and political education in the Fundamental Nursing course based on the CIPP model. A preliminary framework has been developed, comprising 4 first-level indicators, 12 second-level indicators, and 42 third-level indicators. We sincerely invite you to provide valuable insights from a professional perspective regarding the importance, rationality, and feasibility of each indicator.

**I. Basic Information of the Expert**

1. Your age range:
   □ 31-35 years □ 36-40 years □ 41-45 years □ 46-50 years □ 51-55 years □ 56-60 years □ Above 60 years
2. Work unit: __________
3. Highest education degree:
   □ Doctorate □ Master's □ Bachelor's
4. Professional title: __________
5. Nature of work (multiple choices allowed):
   □ Teaching □ Administration □ Research
6. Research field: __________
7. Position or qualifications: __________

**II. Self-Assessment of Expert Authority**

1. **The basis for your judgment on the evaluation of ideological and political education in the Fundamental Nursing course (Please tick "√" in the appropriate box):**

| Basis for Judgment | High | Medium | Low |
| --- | --- | --- | --- |
| Theoretical analysis | □ | □ | □ |
| Practical experience | □ | □ | □ |
| Knowledge of domestic and international peers | □ | □ | □ |
| Intuitive judgment | □ | □ | □ |

1. **Your familiarity with ideological and political education in the Fundamental Nursing course:**
   □ Very familiar □ Familiar □ Somewhat familiar □ Neutral □ Somewhat unfamiliar □ Very unfamiliar

**III. Importance Evaluation of First-Level Indicators**

| CIPP Dimension | First-Level Indicator | Very Important (5) | Relatively Important (4) | General (3) | Not Very Important (2) | Not Important at All (1) |
| --- | --- | --- | --- | --- | --- | --- |
| Context Evaluation | Context Evaluation | □ | □ | □ | □ | □ |
| Input Evaluation | Input Evaluation | □ | □ | □ | □ | □ |
| Process Evaluation | Process Evaluation | □ | □ | □ | □ | □ |
| Product Evaluation | Product Evaluation | □ | □ | □ | □ | □ |

**Ⅳ. Importance Evaluation of Second-Level Indicators**

| First-Level Indicator | Second-Level Indicator | Very Important (5) | Relatively Important (4) | General (3) | Not Very Important (2) | Not Important at All (1) |
| --- | --- | --- | --- | --- | --- | --- |
| **Context Evaluation** | Course Positioning | □ | □ | □ | □ | □ |
|  | Course Objectives | □ | □ | □ | □ | □ |
| **Input Evaluation** | Teaching Staff | □ | □ | □ | □ | □ |
|  | Course Resources | □ | □ | □ | □ | □ |
|  | Course Structure | □ | □ | □ | □ | □ |
|  | Practice Guarantee | □ | □ | □ | □ | □ |
| **Process Evaluation** | Student Participation | □ | □ | □ | □ | □ |
|  | Teacher Guidance | □ | □ | □ | □ | □ |
|  | Teaching Evaluation | □ | □ | □ | □ | □ |
| **Product Evaluation** | Development of Student Competencies | □ | □ | □ | □ | □ |
|  |  |  |  |  |  |  |
|  | Advancement of Course Construction | □ | □ | □ | □ | □ |
|  | Growth of Teaching Team | □ | □ | □ | □ | □ |
|  | Impact of Social Service | □ | □ | □ | □ | □ |

**Modification Suggestions:** __________

**V. Importance Evaluation of Third-Level Indicators**

| First-Level Indicator | Second-Level Indicator | Third-Level Indicator | Very Important (5) | Relatively Important (4) | General (3) | Not Very Important (2) | Not Important at All (1) |
| --- | --- | --- | --- | --- | --- | --- | --- |
| Context Evaluation | Course Positioning | Alignment with national policies such as "Healthy China 2030" | □ | □ | □ | □ | □ |
|  |  | Matching the competency needs of new quality productive forces in nursing | □ | □ | □ | □ | □ |
|  |  | Responding to issues of nursing students' professional identity and humanistic spirit | □ | □ | □ | □ | □ |
|  | Course Objectives | Systematic presentation of ideological and political education objectives | □ | □ | □ | □ | □ |
|  |  | Connection between ideological and political content and students' knowledge structure | □ | □ | □ | □ | □ |
|  |  | Shaping professional values and critical thinking | □ | □ | □ | □ | □ |
| Input Evaluation | Teaching Staff | Professional title and educational background structure of the teaching team | □ | □ | □ | □ | □ |
|  |  | Teachers' political literacy and professional ethics | □ | □ | □ | □ | □ |
|  |  | Regular ideological and political training and teaching reflection | □ | □ | □ | □ | □ |
|  | Course Resources | Use of nationally planned textbooks | □ | □ | □ | □ | □ |
|  |  | Simulation of public health event nursing scenarios | □ | □ | □ | □ | □ |
|  |  | Updating digital resources for ideological and political education in nursing | □ | □ | □ | □ | □ |
|  | Course Structure | Ideological and political concepts run throughout all chapters | □ | □ | □ | □ | □ |
|  |  | Theoretical teaching focusing on value guidance, practical teaching emphasizing behavior formation | □ | □ | □ | □ | □ |
|  |  | Integration of interdisciplinary resources (such as medical ethics, nursing humanities) | □ | □ | □ | □ | □ |
|  | Practice Guarantee | College issuing special systems and incentive measures | □ | □ | □ | □ | □ |
|  |  | Establishing special funds for ideological and political education in courses | □ | □ | □ | □ | □ |
|  |  | Establishing normalized monitoring and feedback mechanisms | □ | □ | □ | □ | □ |
| Process Evaluation | Student Participation | Observing discipline, standardizing operations, diligent in practice | □ | □ | □ | □ | □ |
|  |  | Active thinking and expression of views | □ | □ | □ | □ | □ |
|  |  | Practicing humanistic care and rigorous work style | □ | □ | □ | □ | □ |
|  |  | Demonstrating responsibility and commitment in teamwork | □ | □ | □ | □ | □ |
|  | Teacher Guidance | Using multidimensional teaching methods to stimulate value deliberation | □ | □ | □ | □ | □ |
|  |  | Integrating ideological and political elements through clinical practice | □ | □ | □ | □ | □ |
|  |  | Timely guidance on value judgment and ethical cognition | □ | □ | □ | □ | □ |
|  |  | Paying attention to individual differences, providing personalized encouragement | □ | □ | □ | □ | □ |
|  |  | Providing specific and constructive value feedback | □ | □ | □ | □ | □ |
|  | Teaching Evaluation | Comprehensive evaluation of ideological and political performance and professional competence | □ | □ | □ | □ | □ |
|  |  | Process evaluation of value internalization and behavior formation | □ | □ | □ | □ | □ |
|  |  | Multi-party corroboration evaluation of teaching subjects and clinical practice | □ | □ | □ | □ | □ |
| Product Evaluation | Development of Student Competencies | Degree of internalization of professional values | □ | □ | □ | □ | □ |
|  |  | Satisfaction and sense of gain from teaching activities | □ | □ | □ | □ | □ |
|  |  | Enhancement of humanistic care competency | □ | □ | □ | □ | □ |
|  |  | Establishment of professional identity and sense of mission | □ | □ | □ | □ | □ |
|  |  | Development of teamwork and communication skills | □ | □ | □ | □ | □ |
|  |  | Critical thinking and innovation ability | □ | □ | □ | □ | □ |
|  |  | Autonomous learning and professional development ability | □ | □ | □ | □ | □ |
|  |  | Sense of social responsibility and public service awareness | □ | □ | □ | □ | □ |
|  | Advancement of Course Construction | Completeness of ideological and political teaching resource database construction | □ | □ | □ | □ | □ |
|  |  | Degree of optimization of course standards and syllabi | □ | □ | □ | □ | □ |
|  |  | Innovativeness of teaching methods and means | □ | □ | □ | □ | □ |
|  |  | Scientific nature of the assessment and evaluation system | □ | □ | □ | □ | □ |
|  |  | Rationality of practical teaching session design | □ | □ | □ | □ | □ |
|  |  | Level of digital teaching resource construction | □ | □ | □ | □ | □ |
|  |  | Cultivation of course characteristics and innovation points | □ | □ | □ | □ | □ |
|  |  | Continuous improvement mechanism of teaching quality | □ | □ | □ | □ | □ |
|  | Growth of Teaching Team | Level of teachers' ideological and political teaching ability | □ | □ | □ | □ | □ |
|  |  | Quality of teaching research output | □ | □ | □ | □ | □ |
|  |  | Team collaboration and communication mechanism | □ | □ | □ | □ | □ |
|  |  | Awareness of teaching reflection and improvement | □ | □ | □ | □ | □ |
|  |  | Course development and design ability | □ | □ | □ | □ | □ |
|  |  | Teaching innovation and practical ability | □ | □ | □ | □ | □ |
|  |  | Effectiveness of professional ethics construction | □ | □ | □ | □ | □ |
|  |  | Level of professional development and growth | □ | □ | □ | □ | □ |
|  | Impact of Social Service | Employer satisfaction | □ | □ | □ | □ | □ |
|  |  | Career development performance of graduates | □ | □ | □ | □ | □ |
|  |  | Contribution to serving social health undertakings | □ | □ | □ | □ | □ |
|  |  | Inter-school exchanges and demonstration role | □ | □ | □ | □ | □ |
|  |  | Promotion value of course construction experience | □ | □ | □ | □ | □ |
|  |  | Promotion of nursing service quality | □ | □ | □ | □ | □ |
|  |  | Influence building in the professional field | □ | □ | □ | □ | □ |
|  |  | Guiding role in social health concepts | □ | □ | □ | □ | □ |

**Modification Suggestions:** __________

**VI. Other Opinions or Suggestions**

Please provide any other valuable opinions or suggestions regarding the constructed evaluation index system for ideological and political education in the Fundamental Nursing course:
